# Supplementary material for: Heterogeneous Neurophenotypes of Adolescent Sleep Insufficiency Stratify Natural Short Sleepers from Comorbidity or Environment Driven Insufficiency
Source: Research Square preprint supplement (doi:10.21203/rs.3.rs-6851158/v1), 2025-06-25
Supplement: Supplementary file 1 [file 5c17c4fae821477a9157b3b3.docx]

**Supplementary Information**

**
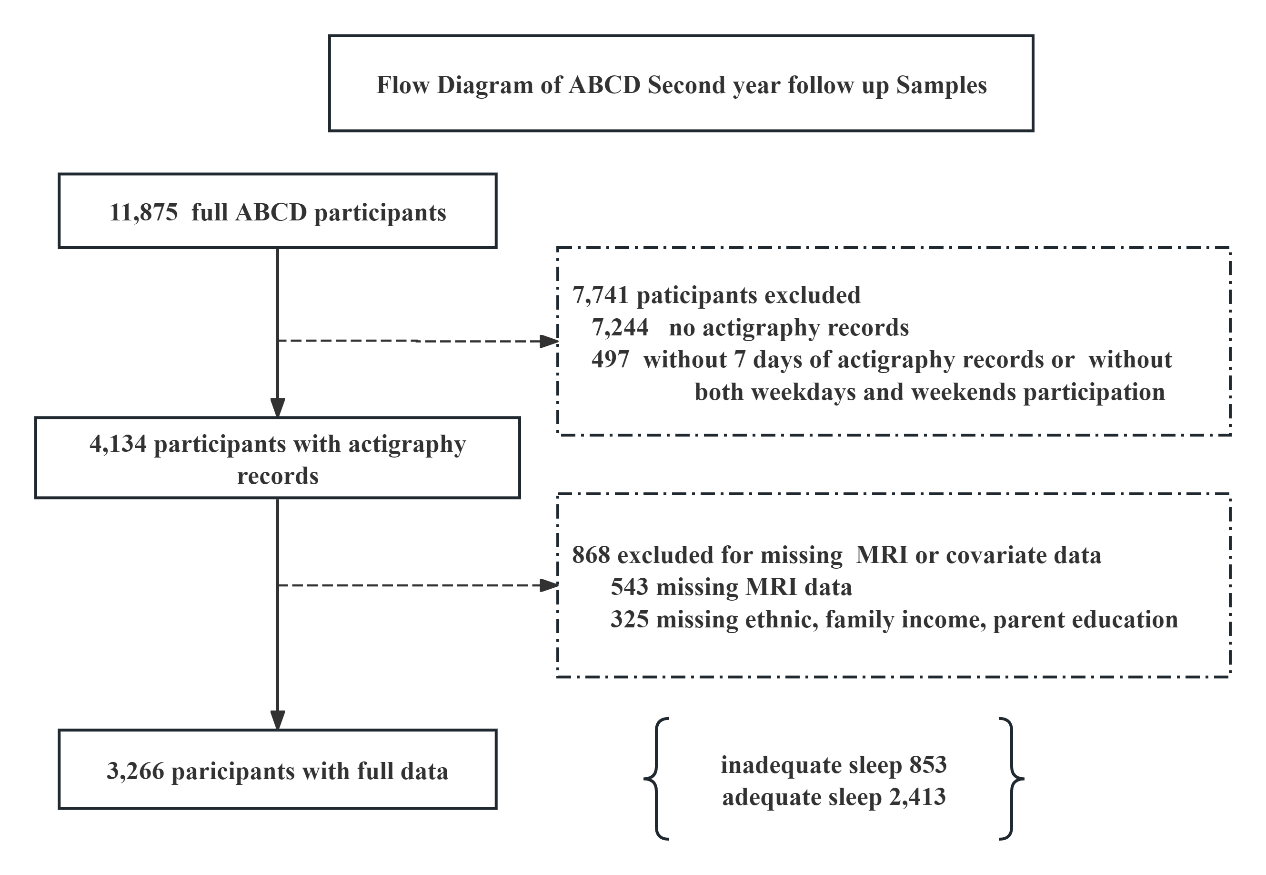
**

**Fig. S1 Participant inclusion flowchart of the ABCD study.**

**
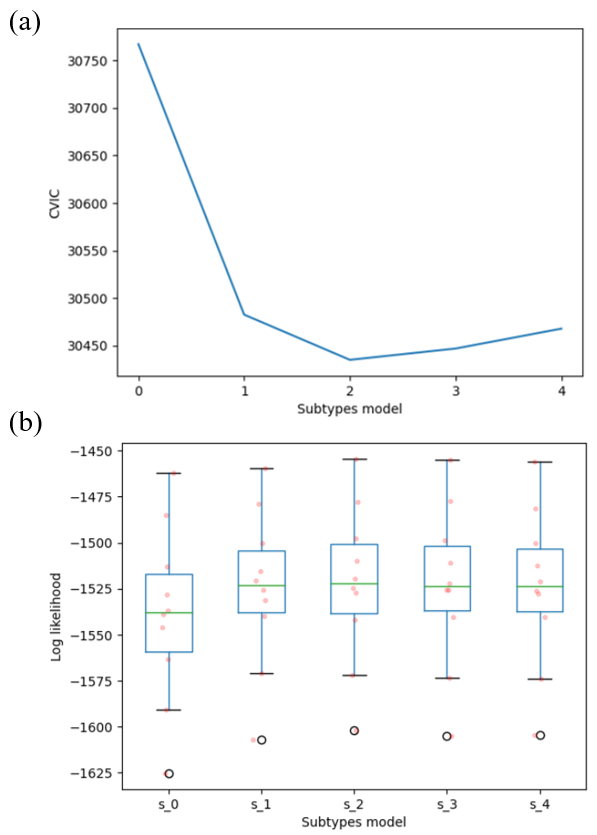
**

**Fig. S2 The optimum number of insufficient sleep subtypes. (a)** cross-validation information criterion (CVIC), 8 hours insufficient sleep cutoff. **(b)** Log-likelihood based on independent individuals with insufficient sleep (n = 853). The box ranges from 25% to 75% quartile values, with a line at the median. The whiskers of the boxes show the range of the data. Data points exceeding these limits are classified as outliers and marked as dots.


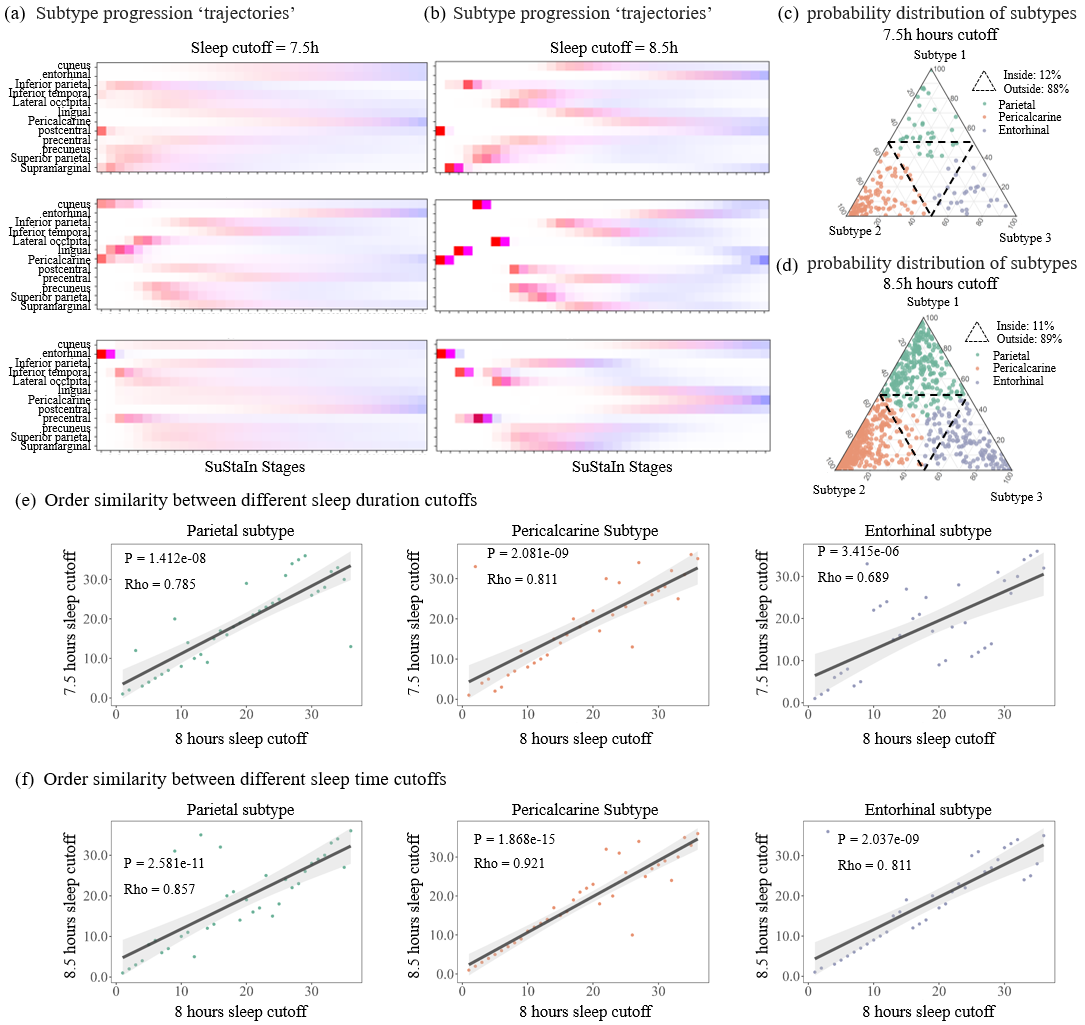


**Fig. S3 Robustness of insufficient sleep subtypes.** We used different sleep duration cutoffs (7.5 hours and 8.5 hours) as validation. **(a),** Three sleep subtype morphological ‘trajectories’ with 7.5 hours cutoff. **(b),** Three sleep subtype morphological ‘trajectories’ with 8.5 hours cutoff. **(c-d)**, Probability-based distribution of three post-effected (i.e., parietal, pericalcarine, and entorhinal) subtypes (**c**, 7.5 hours cutoff; **d**, 8.5 hours cutoff). **(e),** Order similarity of atrophy ‘trajectory’ between the discovery sleep duration (8 hours) and 7.5 hours. Spearman’s rank correlation test (one-tailed P value, FDR corrected) was used. **(f),** Order similarity of atrophy ‘trajectory’ between the discovery sleep duration (8 hours) and 8.5 hours. Spearman’s rank correlation test (one-tailed P value, FDR corrected) was used

**
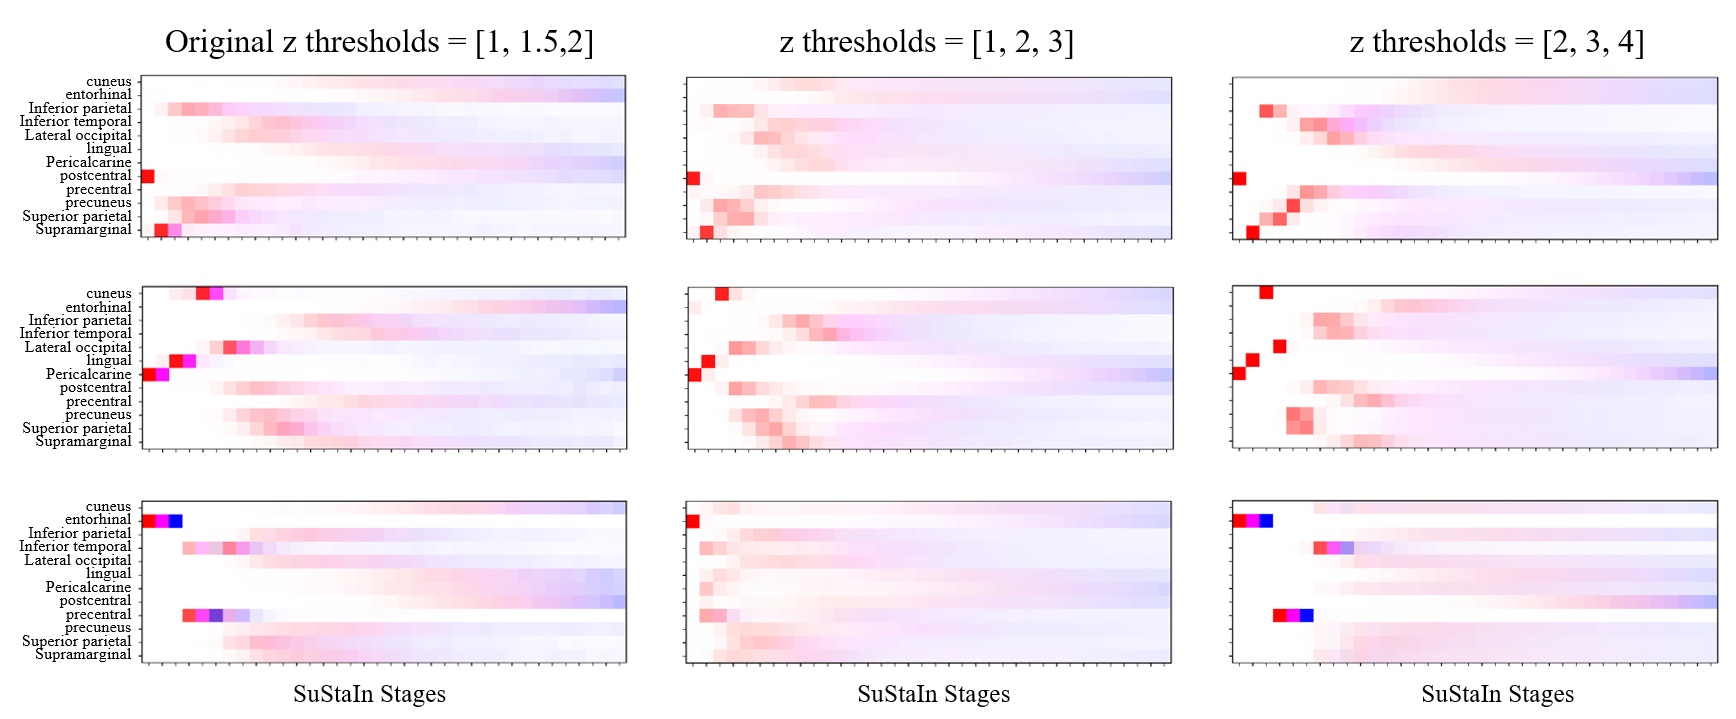
**

**Fig. S4 SulsaIn model with different z score cutoffs**

**
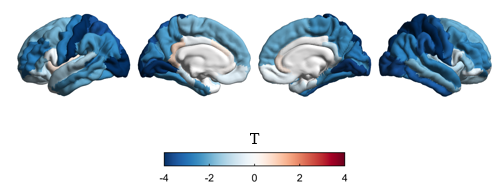
**

**Fig. S5 ROI-based group differences between insufficient and sufficient sleep adolescents measured with subjective sleep duration cutoff of 8 hours.**

**
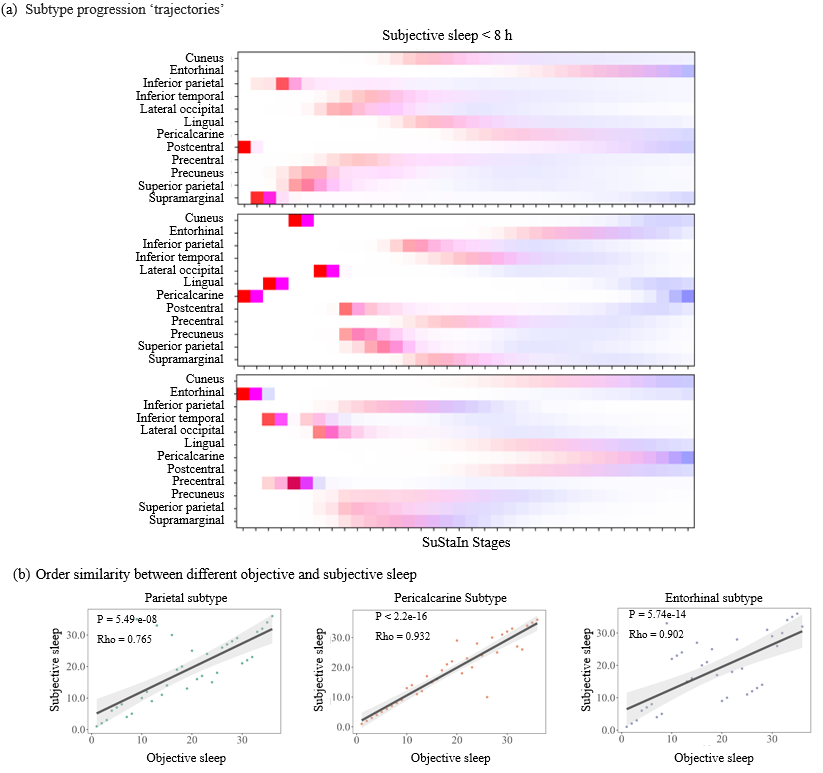
**

**Fig. S6 Robustness of insufficient sleep subtypes replicated with subjective sleep duration measurement.** We used sleep duration measured with the Sleep Disturbance Scale for Children as cutoff (subjective sleep less than 8 hours). **(a),** Three sleep subtype morphological ‘trajectories’ with subjective sleep cutoff. **(b),** Order similarity of atrophy ‘trajectory’ between the discovery objective sleep duration (8 hours) and subjective sleep duration (8 hours). Spearman’s rank correlation test (one-tailed P value, FDR corrected) was used.


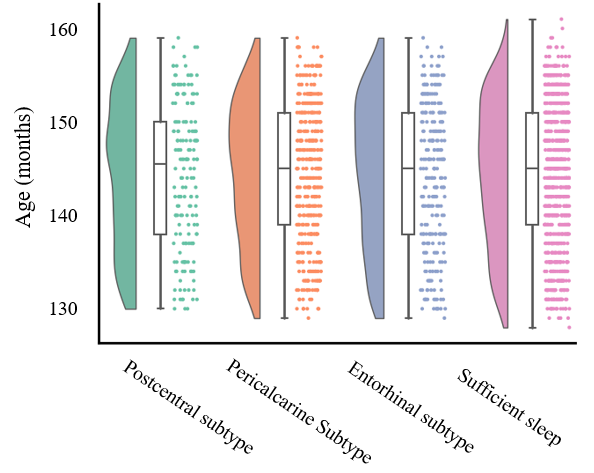


**Fig. S7 Biological age differences between insufficient sleep subtypes.** The biological age of the three insufficient sleep subtypes was no difference compared with the sufficient sleep group.

| Supplementary Table S1. ABCD study second-year follow-up sample characteristics | | |
| --- | --- | --- |
|  | **Sufficient sleep**  **N = 2,413** | **Insufficient sleep**  **N = 853** |
| **Demographic Characteristics** | | |
| **Age** (years), mean (SD) | 11.87 ± 0.64 | 12.03 ± 0.63 |
| **Sex** (male%) | 50.6 | 56.5 |
| **Race** (White%/ Black%/Asian%/Other%) | 87.9/5.3/2.0/4.8 | 69.5/21.2/2.8/6.5 |
| **Ethnic** (Hispanic/ Latino%) | 21.6 | 29.0 |
| **Parental Characteristics** | | |
| **Maternal Birth** **age** (years) | 30.5 ± 5.6 | 29.4 ± 6.4 |
| **Parental Education** (college or more%) | 91 | 86 |
| **Household income** | | |
| **< $11999** (%) | 1.1 | 3.4 |
| **$12 000 – $24999** (%) | 2.7 | 4.0 |
| **$25 000 – $49999** (%) | 8.5 | 17.1 |
| **$50 000 – $99999** (%) | 28.6 | 29.4 |
| **>$100 000** (%) | 59.1 | 46.1 |
| Continuous variables are shown as mean (standard deviation; SD) and categorical variables as percentage (%). | | |

| **Supplementary Table S2 Statistical comparison of three layers of socio-ecological factors (pediatric sleep, individual child factors, and neighborhood environments) between the neuroimaging-based subtypes for the ABCD dataset. Data were presented as p-value /** **Cohen’s d (Rho). Only the significant results were listed.** | | | |
| --- | --- | --- | --- |
|  | **Postcentral vs sufficient sleep** | **Pericalcarine vs sufficient sleep** | **Entorhinal vs sufficient sleep** |
| **Sleep disturbance (p-value /** **Cohen’s d)** | | | |
| DIMS | 0.256 / 0.08 | **0.009** / 0.20 | **<0.001** / 0.33 |
| SBD | 0.820 / -0.06 | 0.208 / 0.11 | 0.704 / 0.05 |
| DA | 0.704 / -0.03 | 0.256 / -0.07 | 0.704 / -0.05 |
| SWTD | 0.099 / -0.13 | **0.009** / -0.16 | 0.704 / -0.05 |
| DOES | 0.878 / -0.02 | 0.339 / 0.08 | 0.647 / 0.05 |
| SHY | 0.767/ 0.07 | 0.704 / -0.04 | 0.704 / -0.02 |
| Weekly sleep loss | 0.397 / 0.12 | **<0.001** / 0.31 | **0.018** / 0.19 |
| **Physical (p-value /** **Cohen’s d) and mental factors (p-value /** **Rho)** | | | |
| Physical activities | 0.984 / -0.002 | **0.041** / -0.167 | **0.148** / -0.261 |
| Externalizing disorders | 0.951 / 0.001 | 0.375 / 0.095 | **0.008** / 0.394 |
| Internalizing disorders | 0.849 / -0.029 | 0.227 / 0.128 | **0.032** / 0.319 |
| Overall disorders | 1 / <0.001 | 0.055 / 0.206 | **0.045**/ 0.30 |
| **Neighborhood environment (p-value /** **Cohen’s d)** | | | |
| Night light | 0.758 / 0.01 | **0.002** / 0.21 | 0.311 / 0.08 |
| Adult insufficient sleep | 0.124 / 0.15 | **<0.001** / 0.32 | **<0.001** /0.25 |
| Income | 0.717 / -0.08 | **<0.001** / 0.28 | 0.068 / 0.17 |
| Education | 0.478 / -0.01 | **<0.001** / 0.19 | 0.246 / 0.06 |
| NH disadvantage | 0.281 / 0.16 | **<0.001** / 0.26 | 0.068 / 0.17 |
| Night noise | 0.776 / <0.01 | **0.002** / 0.21 | 0.112 / 0.16 |

*NH abbreviates for neighborhood. Significant numbers of PFDR < 0.05 were shown in bold, Bonferroni corrected. DIMS abbreviates for disorders of initiating and maintaining sleep; SBD abbreviates for sleep breathing disorders; DA abbreviates for disorder of arousal nightmares; SWTD abbreviates for sleep wake transition disorders; DOES abbreviates for disorder of excessive somnolence; SHY abbreviates for sleep hyperhidrosis.

| **Supplementary Table S3 Statistical comparison of pediatric sleep between the neuroimaging-based subtypes for the Shanghai dataset. Data were presented as p-value /** **Cohen’s d. Only the significant results were listed.** | | | |
| --- | --- | --- | --- |
|  | **Postcentral vs sufficient sleep** | **Pericalcarine vs sufficient sleep** | **Entorhinal vs sufficient sleep** |
| **Pediatric sleep** | | | |
| Bedtime resistance | 0.718 / 0.02 | 0.457 / 0.12 | 0.450/ 0.19 |
| Sleep onset delay | 0.752 / 0.16 | 0.403 / 0.21 | 0.116 / 0.34 |
| Sleep duration | 0.22 / 0.27 | **0.049** / 0.57 | **0.002** / 0.68 |
| Sleep anxiety | 0.973 / 0.07 | 0.066 /0.49 | **0.023** / 0.64 |
| Night wakings | 0.161 / -0.37 | 0.143 / 0.29 | 0.149 / 0.52 |
| Parasomnias | 0.186 / -0.34 | 0.634 / -0.22 | 0.759 / <0.01 |
| Sleep disordered breathing | 0.171 / 0.36 | 0.467 / 0.23 | 0.69 / >-0.01 |
| Daytime sleepiness | 0.339 / -0.22 | 0.714 / 0.13 | 0.955 / <0.01 |

* Significant numbers of PFDR < 0.05 were shown in bold, Bonferroni corrected.
