# Supplementary material for: Heterogeneous Neurophenotypes of Adolescent Sleep Insufficiency Stratify Natural Short Sleepers from Comorbidity or Environment Driven Insufficiency
Source: Research Square preprint supplement (doi:10.21203/rs.3.rs-6851158/v1), 2025-06-25
Supplement: Supplementary file 2 [file cdcaac428034e4832a40bce6.docx]

| **Table S1. Detailed information of neurotransmitter density data.** | | | | | | |
| --- | --- | --- | --- | --- | --- | --- |
| **Receptor/**  **Transporter (*)** | **Neurotransmitter** | **Modality** | **File name** | **N healthy volunteers** | **Males** | **References** |
| 5HT1a | serotonin | PET | 5HT1a_WAY_HC36.nii | 35 | 51% | Savli, M. et al. Normative database of the serotonergic system in healthy subjects using multi-tracer PET. NeuroImage 63, 447–459 (2012). |
| 5HT1b | serotonin | PET | 5HT1b_az_hc36_beliveau.nii | 36 | 67% | Beliveau, V. et al. A High-Resolution In Vivo Atlas of the Human Brain’s Serotonin System. J. Neurosci. 37, 120–128 (2017). |
| 5HT2a | serotonin | PET | 5HT2a_cimbi_hc29_beliveau.nii | 29 | 52% | Beliveau, V. et al. A High-Resolution In Vivo Atlas of the Human Brain’s Serotonin System. J. Neurosci. 37, 120–128 (2017). |
| 5HT4 | serotonin | PET | 5HT4_sb20_hc59_beliveau.nii | 59 | 70% | Beliveau, V. et al. A High-Resolution In Vivo Atlas of the Human Brain’s Serotonin System. J. Neurosci. 37, 120–128 (2017). |
| D1 | dopamine | PET | D1_SCH23390_c11.nii | 13 | 46% | Kaller, S. et al. Test–retest measurements of dopamine D1-type receptors using simultaneous PET/MRI imaging. Eur. J. Nucl. Med. Mol. Imaging 44, 1025–1032 (2017). |
| D2 | dopamine | PET | D2_fallypride_hc49_jaworska.nii | 49 | 33% | Jaworska, N., Cox, S.M.L., Tippler, M. et al. Extra-striatal D2/3 receptor availability in youth at risk for addiction. Neuropsychopharmacol. 45, 1498–1505 (2020). |
| DAT* | dopamine | SPECT | DAT_DATSPECT.nii | 174 | 63% | Dukart, J. et al. Cerebral blood flow predicts differential neurotransmitter activity. Sci. Rep. 8, 4074 (2018). |
| GABAa | GABA | PET | GABAa_flumazenil_hc16_norgaard.nii | 16 | 44% | Nørgaard, M. et al. A high-resolution in vivo atlas of the human brain’s benzodiazepine binding site of GABAA receptors. NeuroImage 232, 117878 (2021). |
